# Supplementary material for: Validation of control genes and a standardised protocol for quantifying gene expression in the livers of C57BL/6 and ApoE−/− mice
Source: PubMed Central journal article supplement (PMC5967315; doi:10.1038/s41598-018-26431-3), 2018-05-24
Supplement: 41598_2018_26431_MOESM1_ESM.pdf [file 41598_2018_26431_MOESM1_ESM.pdf]

Sequencing product and chromatogram from forward primer ( CTA AGG CCA ACC GTG AAA AG ) - **GACCTTCAACACCCCAGCCATGTACGTAGCCATCCAGGCTGTGCTGTCCCTGTATGCCTCTGGT**

Note: Positions 3, 8 were called manually as a C and an A, respectively.

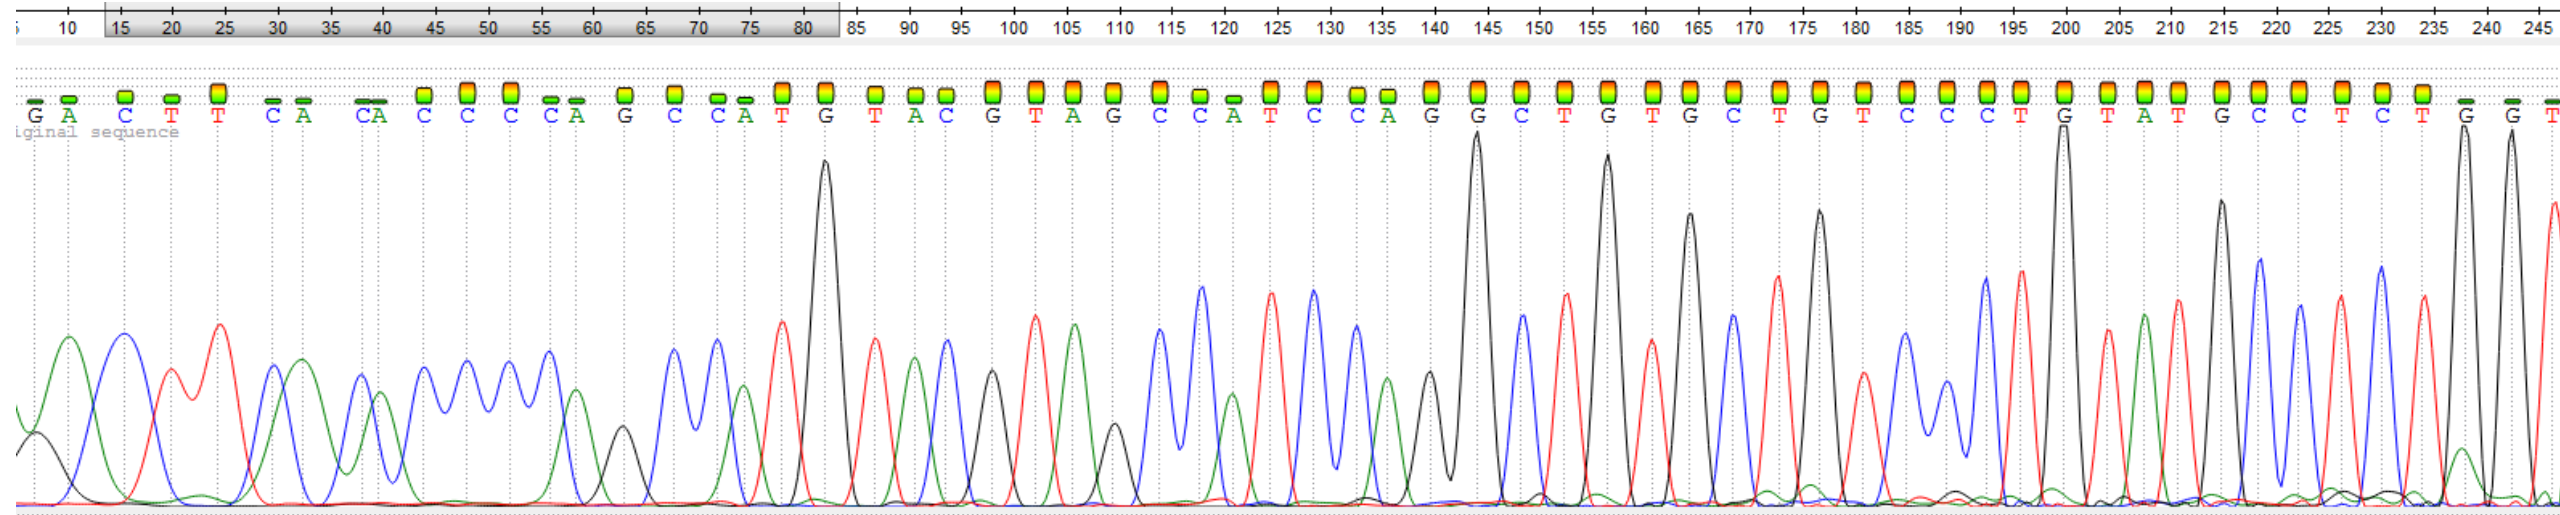

15 16 17 18 19 20 21 22 23 24 25 26 27 28 29 30 31 32 33 34 35 36 37 38 39 40 41 42 43 44 45 46 47 48 49 50 51 52 53 54 55 56 57 58 59 60 61 62 63 64 65 66 67 68 69 70 71 72 73 74 75 76

Download [GenBank](#) [Graphics](#) Sort by:

Mus musculus actin, beta (Actb), mRNA  
Sequence ID: [NM\\_007393.5](#) Length: 1935 Number of Matches: 2

Range 1: 484 to 547 [GenBank](#) [Graphics](#)

| Score        | Expect                                                           | Identities  | Gaps     | Strand    |
|--------------|------------------------------------------------------------------|-------------|----------|-----------|
| 119 bits(64) | 3e-26                                                            | 64/64(100%) | 0/64(0%) | Plus/Plus |
| Query 1      | GACCTTCAACACCCCAGCCATGTACGTAGCCATCCAGGCTGTGCTGTCCCTGTATGCCTC 60  |             |          |           |
| Sbjct 484    | GACCTTCAACACCCCAGCCATGTACGTAGCCATCCAGGCTGTGCTGTCCCTGTATGCCTC 543 |             |          |           |
| Query 61     | TGGT 64                                                          |             |          |           |
| Sbjct 544    | TGGT 547                                                         |             |          |           |

Download [GenBank](#) [Graphics](#)

Mus musculus leucine rich repeat containing 58 (Lrrc58), mRNA  
Sequence ID: [NM\\_177093.3](#) Length: 8592 Number of Matches: 1

Range 1: 2626 to 2683 [GenBank](#) [Graphics](#)

| Score         | Expect                                                          | Identities | Gaps     | Strand    |
|---------------|-----------------------------------------------------------------|------------|----------|-----------|
| 91.6 bits(49) | 6e-18                                                           | 55/58(95%) | 0/58(0%) | Plus/Plus |
| Query 7       | CAACACCCCAGCCATGTACGTAGCCATCCAGGCTGTGCTGTCCCTGTATGCCTCTGGT 64   |            |          |           |
| Sbjct 2626    | CAATACCCCAGCCATGTCTGTAGCCATCCAGGCTGTGCTGTCCCTGTATGCCTCTGGT 2683 |            |          |           |

**Manuscript title: Validation of control genes and a standardised protocol for quantifying gene expression in the livers of C57BL/6 and ApoE<sup>-/-</sup> mice**

**Authors:** Priscilla EL Day<sup>1</sup>, Karen F Chambers<sup>1</sup>, Mark S Winterbone<sup>1</sup>, Tatiana García-Blanco<sup>1</sup>, David Vauzour<sup>2</sup>, Paul A Kroon<sup>1</sup>
