# Supplementary material for: Validation of control genes and a standardised protocol for quantifying gene expression in the livers of C57BL/6 and ApoE−/− mice
Source: PubMed Central journal article supplement (PMC5967315; doi:10.1038/s41598-018-26431-3), 2018-05-24
Supplement: 41598_2018_26431_MOESM2_ESM.pdf [file 41598_2018_26431_MOESM2_ESM.pdf]

Sequencing product and chromatogram from reverse primer (ACC AGA GGC ATA CAG GGA CA) - **TGGCTGGGGTGTGAAGGTCTCAAACATGATCTGGGTATCTTTTCACGGTTGGCCTTAG**

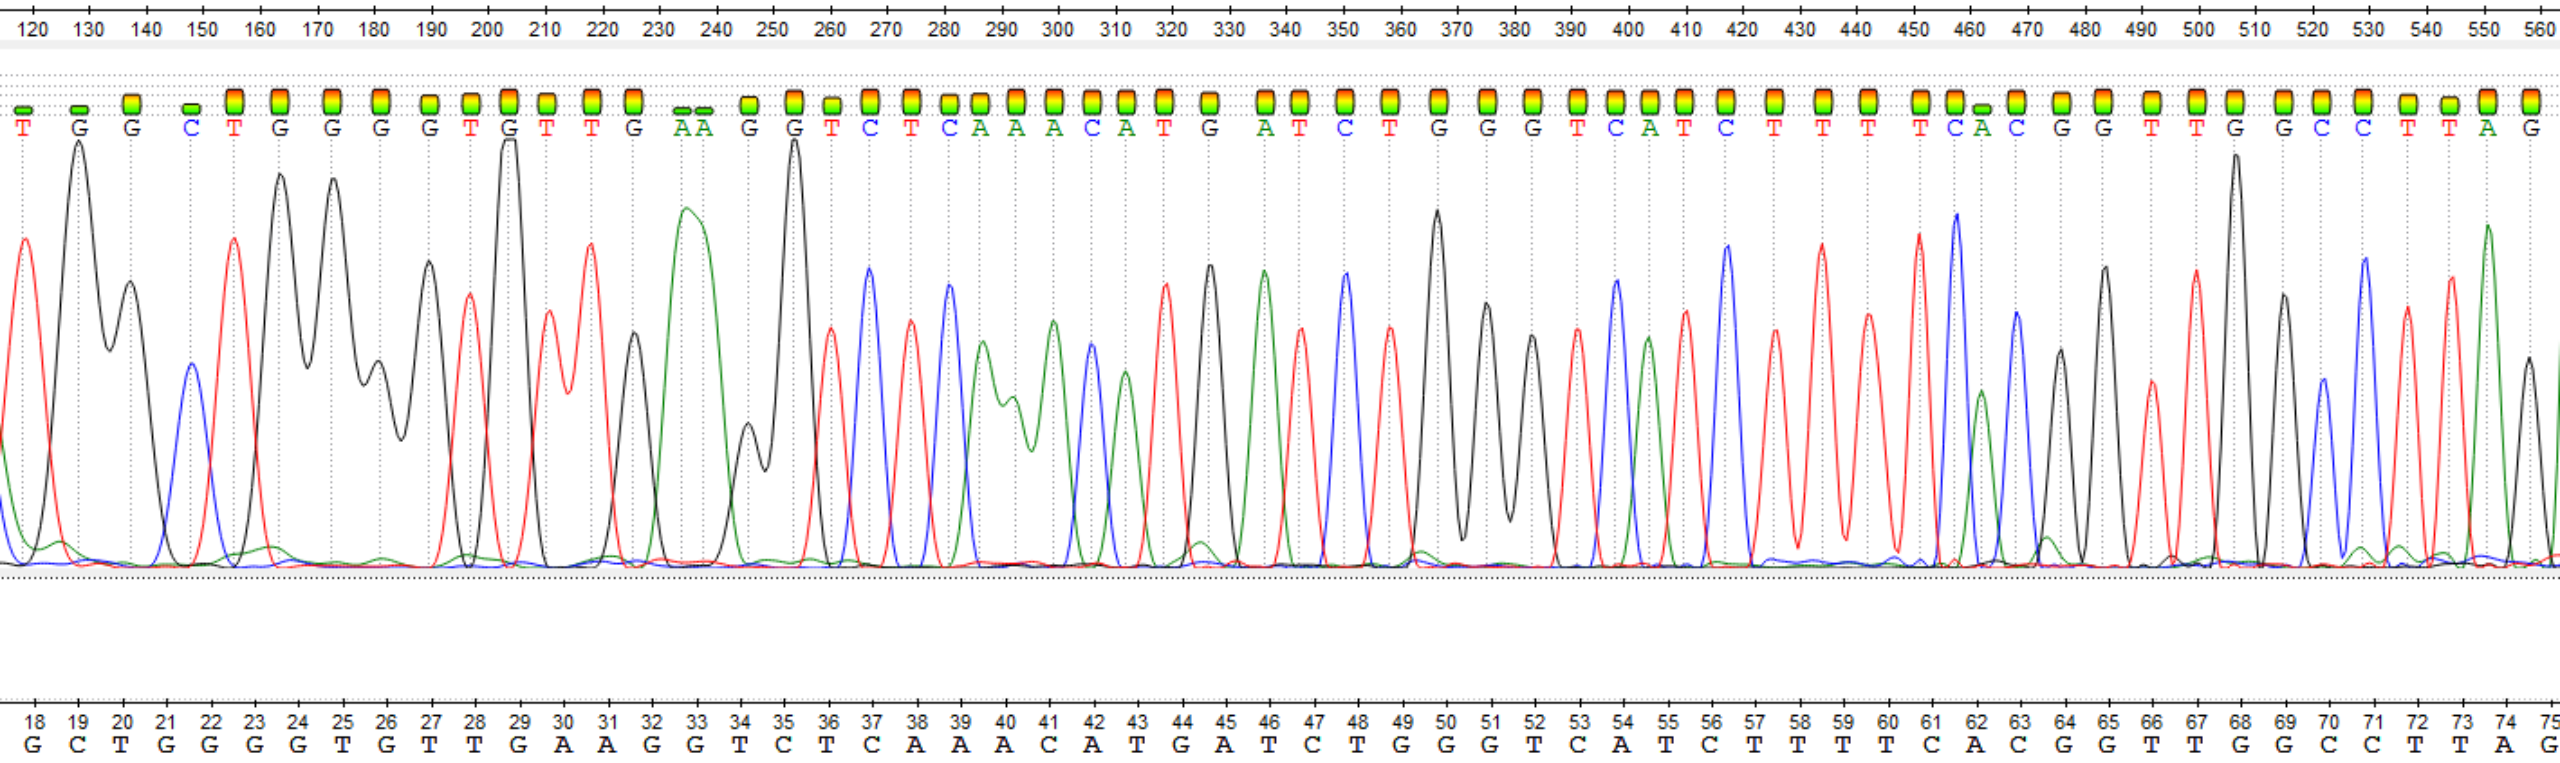

Download [GenBank](#) [Graphics](#)

Mus musculus actin, beta (Actb), mRNA  
 Sequence ID: [NM\\_007393.5](#) Length: 1935 Number of Matches: 1

Range 1: 444 to 503 [GenBank](#) [Graphics](#) [Next Match](#) [Previous Match](#)

| Score        | Expect | Identities  | Gaps     | Strand     |
|--------------|--------|-------------|----------|------------|
| 111 bits(60) | 4e-24  | 60/60(100%) | 0/60(0%) | Plus/Minus |

```

Query 1 TGGCTGGGGTGTGAAGGTCTCAAACATGATCTGGGTATCTTTTCACGGTTGGCCTTAG 60
Sbjct 503 TGGCTGGGGTGTGAAGGTCTCAAACATGATCTGGGTATCTTTTCACGGTTGGCCTTAG 444
    
```

Download [GenBank](#) [Graphics](#)

Mus musculus leucine rich repeat containing 58 (Lrrc58), mRNA  
 Sequence ID: [NM\\_177093.3](#) Length: 8592 Number of Matches: 1

Range 1: 2583 to 2639 [GenBank](#) [Graphics](#) [Next Match](#) [Previous Match](#)

| Score         | Expect | Identities | Gaps     | Strand     |
|---------------|--------|------------|----------|------------|
| 80.5 bits(43) | 1e-14  | 55/60(92%) | 3/60(5%) | Plus/Minus |

```

Query 1 TGGCTGGGGTGTGAAGGTCTCAAACATGATCTGGGTATCTTTTCACGGTTGGCCTTAG 60
Sbjct 2639 TGGCTGGGGTATTG---GTCTCAAACATGATCTGGGTATCTTTTCACGGTTGGCCTTAG 2583
    
```

**Manuscript title: Validation of control genes and a standardised protocol for quantifying gene expression in the livers of C57BL/6 and ApoE<sup>-/-</sup> mice**

**Authors:** Priscilla EL Day<sup>1</sup>, Karen F Chambers<sup>1</sup>, Mark S Winterbone<sup>1</sup>, Tatiana García-Blanco<sup>1</sup>, David Vauzour<sup>2</sup>, Paul A Kroon<sup>1</sup>
